# Supplementary material
Source: publisher figshare collection journal article supplement (https://sage.figshare.com/ndownloader/files/18531233)
Supplement: Supplementary file 1 [file 18531233]

## Transparency and Replication in Cross-National Survey Research: Identification of Problems and Possible Solutions

### Appendix 1. List of variables in the Research Transparency dataset (N=305)

| ID                                                                            | Variable                                                                      | Answer categories                                                                            |
|-------------------------------------------------------------------------------|-------------------------------------------------------------------------------|----------------------------------------------------------------------------------------------|
| art_id                                                                        | Article ID                                                                    | -                                                                                            |
| <b>Information about sampling</b>                                             |                                                                               |                                                                                              |
| Q22_1                                                                         | a) Description of survey population                                           | a) In the article; b) Supplementary materials; c) External source; d) No mention             |
| Q22_5                                                                         | b) Sampling frame                                                             | a) In the article; b) Supplementary materials; c) External source; d) No mention             |
| Q22_2                                                                         | c) Type(s) of sampling used (Sampling design)                                 | a) In the article; b) Supplementary materials; c) External source; d) No mention             |
| Q22_3                                                                         | d) Survey mode(s)                                                             | a) In the article; b) Supplementary materials; c) External source; d) No mention             |
| Q22_4                                                                         | e) Response rate(s)                                                           | a) In the article; b) Supplementary materials; c) External source; d) No mention             |
| Q25_1                                                                         | Discussion about non-response and selection bias                              | a) In the article; b) Supplementary materials; c) External source; d) No mention             |
| Q25_2                                                                         | Use of weights                                                                | a) In the article; b) Supplementary materials; c) External source; d) No mention             |
| Q25_7                                                                         | Information about the percentage/number of item non-response (missing values) | a) In the article; b) Supplementary materials; c) External source; d) No mention             |
| Q25_8                                                                         | Information about how missing data was handled                                | a) In the article; b) Supplementary materials; c) External source; d) No mention             |
| Q25_9                                                                         | Total study sample size (N)                                                   | a) In the article; b) Supplementary materials; c) External source; d) No mention             |
| Q25_10                                                                        | Total study sample size per country                                           | a) In the article; b) Supplementary materials; c) External source; d) No mention             |
| Q27_1                                                                         | Number of countries included in the final study sample                        | Yes; b) No                                                                                   |
| Q27_2                                                                         | List of countries                                                             | Yes; b) No                                                                                   |
| <b>Dependent variables</b>                                                    |                                                                               |                                                                                              |
| DV1                                                                           | What measures are used for DEPENDENT VARIABLES?                               | a) Objective measures<br>b) Subjective measures<br>c) Both objective and subjective measures |
| <b>Information provided about dependent variables with objective measures</b> |                                                                               |                                                                                              |
| DV2_3                                                                         | Exact question(s)/item(s)                                                     | a) Yes, for all variables, b) Yes, for some variables, c) No                                 |
| DV2_2                                                                         | Question number or name                                                       | a) Yes, for all variables, b) Yes, for some variables, c) No                                 |

|                                                                                       |                                                                  |                                                                                                                    |
|---------------------------------------------------------------------------------------|------------------------------------------------------------------|--------------------------------------------------------------------------------------------------------------------|
| DV2_1                                                                                 | Description of the operationalization of the theoretical concept | a) Yes, for all variables, b) Yes, for some variables, c) No                                                       |
| DV2_4                                                                                 | Full range / coding categories                                   | a) Yes, for all variables, b) Yes, for some variables, c) No                                                       |
| DV2_5                                                                                 | Reference to the survey questionnaire                            | a) Yes, for all variables, b) Yes, for some variables, c) No                                                       |
| <b><i>Information provided about dependent variables with subjective measures</i></b> |                                                                  |                                                                                                                    |
| DV3_3                                                                                 | Exact question(s)/item(s)                                        | a) Yes, for all variables; b) Yes, for some variables; c) No                                                       |
| DV3_2                                                                                 | Question number or name                                          | a) Yes, for all variables; b) Yes, for some variables; c) No                                                       |
| DV3_1                                                                                 | Description of the operationalization of the theoretical concept | a) Yes, for all variables; b) Yes, for some variables; c) No                                                       |
| DV3_4                                                                                 | Answer categories                                                | a) Yes, for all variables; b) Yes, for some variables; c) No                                                       |
| DV3_5                                                                                 | Reference to the survey questionnaire                            | a) Yes, for all variables; b) Yes, for some variables; c) No                                                       |
| <b><i>Contextual variables</i></b>                                                    |                                                                  |                                                                                                                    |
| DV6                                                                                   | Is the dependent variable aggregated at the country level?       | a) Yes; b) No                                                                                                      |
| CV1                                                                                   | Does the study include contextual-level variables:               | Yes, aggregated contextual variables; b) Yes, contextual variables from external sources; c) No                    |
| <b><i>Information about aggregated contextual variables</i></b>                       |                                                                  |                                                                                                                    |
| CV2_2                                                                                 | Exact question(s)/item(s)                                        | a) Yes, for all variables; b) Yes, for some variables; c) No                                                       |
| CV2_3                                                                                 | Question number or name                                          | a) Yes, for all variables; b) Yes, for some variables; c) No                                                       |
| CV2_1                                                                                 | Description of the operationalization of the theoretical concept | a) Yes, for all variables; b) Yes, for some variables; c) No                                                       |
| CV2_4                                                                                 | Answer categories / full range / coding categories               | a) Yes, for all variables; b) Yes, for some variables; c) No                                                       |
| CV2_5                                                                                 | Reference to the survey questionnaire                            | a) Yes, for all variables; b) Yes, for some variables; c) No                                                       |
| <b><i>Information about contextual variables from external sources</i></b>            |                                                                  |                                                                                                                    |
| CV3_1                                                                                 | Description of the operationalization of the theoretical concept | a) Yes, for all variables; b) Yes, for some variables; c) In the article; d) Supplementary material; e) No mention |
| CV3_1                                                                                 | Code of the original indicator                                   | a) Yes, for all variables; b) Yes, for some variables; c) In the article; d) Supplementary material; e) No mention |

|       |                                                 |                                                                                                                    |
|-------|-------------------------------------------------|--------------------------------------------------------------------------------------------------------------------|
| CV3_3 | Year of the data                                | a) Yes, for all variables; b) Yes, for some variables; c) In the article; d) Supplementary material; e) No mention |
| CV3_4 | Source of the data (e.g. Eurostat)              | a) Yes, for all variables; b) Yes, for some variables; c) In the article; d) Supplementary material; e) No mention |
| CV3_5 | Reference to the source (e.g. Eurostat website) | a) Yes, for all variables; b) Yes, for some variables; c) In the article; d) Supplementary material; e) No mention |
| Q33   | Dataset version                                 | a) In the article; b) In the supplementary materials; c) External source; d) No mention                            |
| Q340  | Replication materials                           | a) Yes, all materials; b) Yes, some materials (e.g. partial syntax); c) None                                       |
| Q341  | Where are the replication materials located?    | a) In the supplementary materials; b) External source; c) Upon request; d) In the article                          |
